# Supplementary material for: An Optimal Cost Effectiveness Study on Zimbabwe Cholera Seasonal Data from 2008–2011
Source: PubMed Central journal article supplement (PMC3849194; doi:10.1371/journal.pone.0081231), 2013-12-03
Supplement: pone.0081231.s002.pdf [file pone.0081231.s002.pdf]

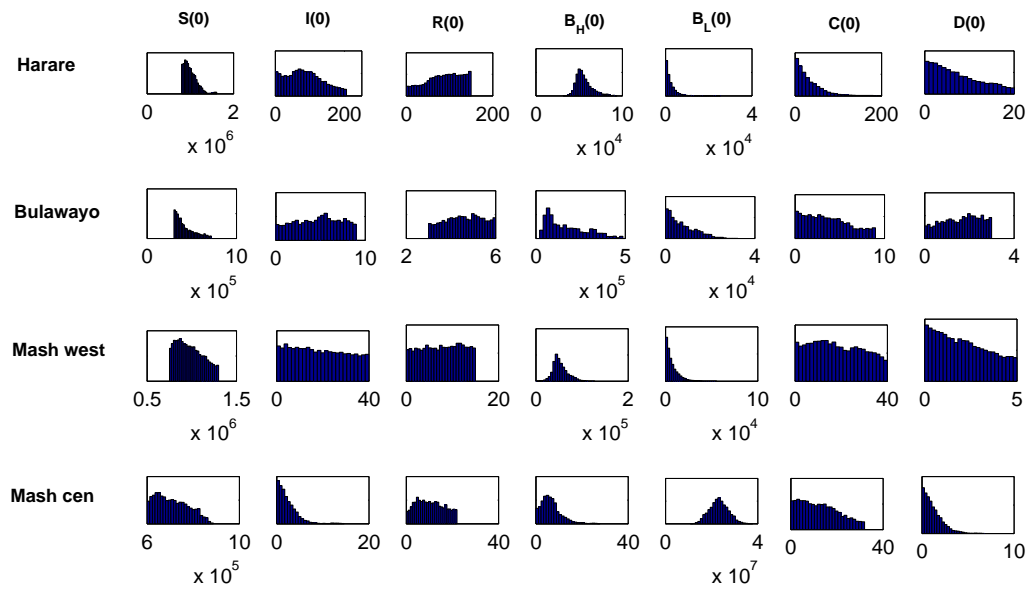

(a)

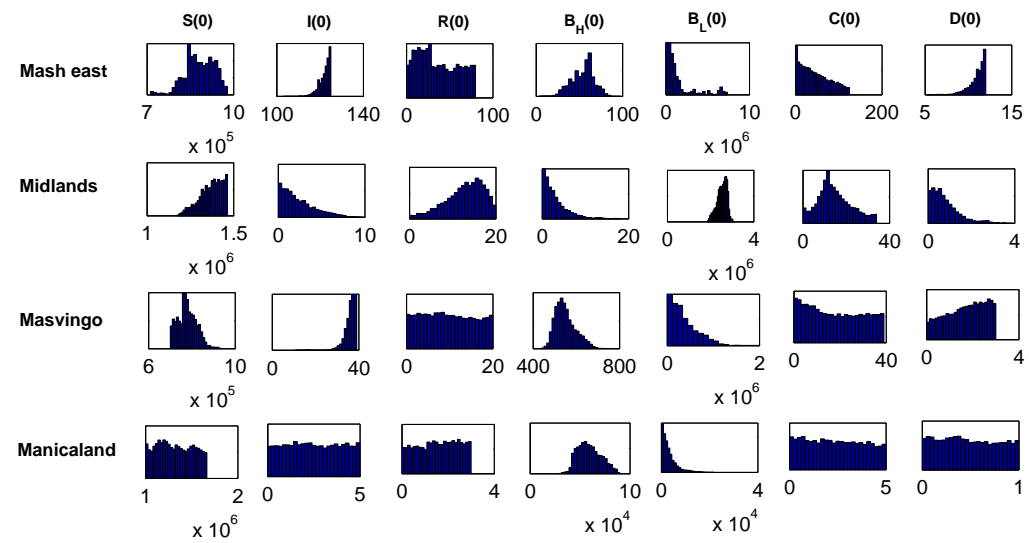

(b)

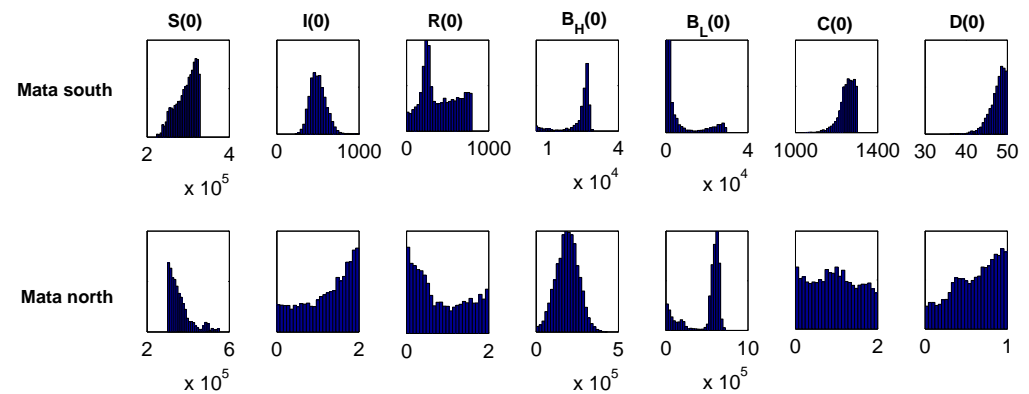

(c)
