# Supplementary material for: An Optimal Cost Effectiveness Study on Zimbabwe Cholera Seasonal Data from 2008–2011
Source: PubMed Central journal article supplement (PMC3849194; doi:10.1371/journal.pone.0081231), 2013-12-03
Supplement: pone.0081231.s003.pdf [file pone.0081231.s003.pdf]

| Parameter                                                            | Symbol       | Value                                                | Reference   |
|----------------------------------------------------------------------|--------------|------------------------------------------------------|-------------|
| Birth rate of human (Zimbabwe)                                       | $\mu_b$      | $6.02 \cdot 10^{-4} \text{ week}^{-1}$               | [1]         |
| Death rate of human (Zimbabwe)                                       | $\mu_d$      | $3.08 \cdot 10^{-4} \text{ week}^{-1}$               | [1]         |
| Recruitment rate of human                                            | $\Pi_H$      | $\mu_b \cdot (S(0) + I(0) + R(0)) \text{ week}^{-1}$ |             |
| Rate of loss of natural immunity                                     | $\omega$     | $0.0238 \text{ week}^{-1}$                           | [2, 3, 4]   |
| Minimum transmission rate of hyper-infectious Bacterium              | $\beta_{H0}$ | Estimated                                            |             |
| Minimum transmission rate of low-infectious Bacterium                | $\beta_{L0}$ | Estimated                                            |             |
| Amplitude of seasonality                                             | $\delta$     | Estimated                                            |             |
| Half saturation constant (low-infectious bacterium)                  | $K_L$        | $10^6 \text{ cells \ ml}$                            | [5, 6]      |
| Half saturation constant (high-infectious bacterium)                 | $K_H$        | $K_L \div 700 \text{ cells \ ml}$                    | [7, 6]      |
| Natural recovery rate of human                                       | $\gamma$     | $1.4 \text{ week}^{-1}$                              | [8, 9]      |
| Death due to cholera infection                                       | $\mu_c$      | Estimated                                            |             |
| Rate of contribution to HI <i>V. cholerae</i> in aquatic environment | $\xi$        | Estimated                                            |             |
| Rate of decay from hyper-infectious to low-infectious bacterium      | $\chi$       | $33.6 \text{ week}^{-1}$                             | [7]         |
| Net death rate of non-HI vibrios in the environment                  | $\delta_L$   | $\frac{7}{30} \text{ week}^{-1}$                     | [6, 10, 11] |

## References

- [1] Central Intelligence Agency (2009), *The World Factbook*. Available: <https://www.cia.gov/library/publications/download/download-2009/index.html>. Accessed July 10, 2012.
- [2] King AA, Ionides EL, Pascual M, Bouma MJ (2008) Inapparent infections and cholera dynamics. *Nature* 454(7206): 877 - 880.
- [3] Levine MM, Black RE, Clements ML, Cisneros L, Nalin DR, et al (1981) Duration of Infection-Derived Immunity to Cholera. *J Infect Dis* 143(6): 818-20.
- [4] Woodward WE (1971) Cholera Reinfection in Man. *J Infect Dis* 123(1): 61-66.
- [5] Codeço CT (2001) Endemic and epidemic dynamics of cholera: the role of the aquatic reservoir. *BMC Infect Dis*: 1:1.
- [6] Hartley DM, Morris JG Jr, Smith DL (2006) Hyperinfectivity: A Critical Element in the Ability of *V. cholerae* to Cause Epidemics? *PLoS Med* 3(1): 63 - 69.
- [7] Merrell DS, Butler SM, Qadri F, Dolganov NA, Alam A (2002) Host-induced epidemic spread of the cholera bacterium. *Nature* 417: 642 - 645.
- [8] Rahaman MM, Majid MA, Alam AKMJ, Islam MR (1976) Effects of doxycycline in actively purging cholera patients: a double-blind clinical trial. *Antimicrob Agent Chem* 10(4): 610 - 612.
- [9] Levine MM, Kaper JB, Herrington D, Losonsky G, Morris JG, et al (1981) Volunteer studies of deletion mutants of *Vibrio cholerae* O1 prepared by recombinant techniques. *Infect Immun* 56(1): 161-67.
- [10] Kaper JB, Morris JG, Levine MM (1995) Cholera. *Clin Micro Rev* 8: 48 - 86.
- [11] Tudor V, Strati I (1977) Smallpox, cholera. Abacus Press, Tunbridge Wells(England).
