# Supplementary material for: An Optimal Cost Effectiveness Study on Zimbabwe Cholera Seasonal Data from 2008–2011
Source: PubMed Central journal article supplement (PMC3849194; doi:10.1371/journal.pone.0081231), 2013-12-03
Supplement: pone.0081231.s004.pdf [file pone.0081231.s004.pdf]

| Parameter                                                                                                | Symbol      | Minimum value          | Maximum value           | Reference |
|----------------------------------------------------------------------------------------------------------|-------------|------------------------|-------------------------|-----------|
| Relative rate of reduction in bacterial ingestion rate by promoting Hand-hygiene and clean water supply. | $\theta(t)$ | 0 week <sup>-1</sup>   | 0.8 week <sup>-1</sup>  | [1]       |
| Rate of Vaccination                                                                                      | $p(t)$      | 0 week <sup>-1</sup>   | 0.35 week <sup>-1</sup> | [2]       |
| Vaccine efficiency                                                                                       | $\sigma$    | 0.67                   | 0.67                    | [3, 4, 5] |
| Rate of waning, vaccine induced immunity                                                                 | $\epsilon$  | 0.5 year <sup>-1</sup> | 0.5 year <sup>-1</sup>  | [3, 4, 5] |
| Proportion of infected individuals receiving antibiotics/oral-rehydration therapy                        | $\alpha(t)$ | 0 week <sup>-1</sup>   | 0.7 week <sup>-1</sup>  | [2]       |
| Relative rate of recovery, receiving antibiotics/oral-rehydration therapy                                | $\lambda$   | 2.3                    | 2.3                     | [6, 7, 3] |
| Relative rate of shedding, receiving antibiotics/oral-rehydration therapy                                | $\psi$      | 0.52                   | 0.52                    | [6, 7, 3] |
| Relative rate of reduction in shedding by promoting sanitation                                           | $s(t)$      | 0 week <sup>-1</sup>   | 0.4 week <sup>-1</sup>  | [1]       |

## References

- [1] World Health Organization (2009), *Global Task Force on Cholera Control, Cholera country profile: Zimbabwe*. Available: <http://www.who.int/cholera/countries/en/Zimbabwe/>. Accessed October 6, 2012.
- [2] Neilan RLM, Schaefer E, Gaff H, Fister KR, (2010) Modeling Optimal Intervention Strategies for Cholera. *Bull Math Biol* 72(8): 2004 - 2018.
- [3] Andrews JR, Basu S, (2011) Transmission Dynamics and Control of Cholera in Haiti: An Epidemic Model. *Lancet* 377(9773): 1248 - 1255.
- [4] Sur D, Lopez AL, Kanungo S (2009) Efficacy and safety of a modified killed-whole-cell oral cholera vaccine in India: an interim analysis of a cluster-randomized, double-blind, placebo-controlled trial. *Lancet* 374(9702): 1694 - 1702.
- [5] Thiem VD, Deen JL, von Seidlein L (2006) Long-term effectiveness against cholera of oral killed whole-cell vaccine produced in Vietnam. *Vaccine* 24(20): 4297-4303.
- [6] Rahaman MM, Majid MA, Alam AKMJ, Islam MR (1976) Effects of doxycycline in actively purging cholera patients: a double-blind clinical trial. *Antimicrob Agent Chem* 10(4): 610 - 612.
- [7] Saha D, Karim MM, Khan WA (2006) Single-Dose Azithromycin for the Threatment of Cholera in Adults. *N Engl J Med* 354(23): 2452 - 2462.
