# Supplementary material for: An Optimal Cost Effectiveness Study on Zimbabwe Cholera Seasonal Data from 2008–2011
Source: PubMed Central journal article supplement (PMC3849194; doi:10.1371/journal.pone.0081231), 2013-12-03
Supplement: pone.0081231.s005.pdf [file pone.0081231.s005.pdf]

| Zimbabwe province   | $\beta_{H0}(\text{week}^{-1})$           | $\beta_{L0}(\text{week}^{-1})$           | $\delta$               | $\xi \left( \frac{\text{cells}}{\text{mL} \cdot \text{person} \cdot \text{week}} \right)$ | $\mu_c(\text{week}^{-1})$ |
|---------------------|------------------------------------------|------------------------------------------|------------------------|-------------------------------------------------------------------------------------------|---------------------------|
| Harare              | $9.973 \cdot E - 5$<br>(0.096–14.1)·E–5  | 0.017<br>(0.012–0.025)                   | 0.923<br>(0.574–0.996) | 9.376<br>(7.03–11.32)                                                                     | 0.048<br>(0.046–0.049)    |
| Bulawayo            | $4.97 \cdot E - 6$<br>(0.552–90.2)·E–6   | $8.26 \cdot E - 4$<br>(6.42–46.4)·E–4    | 0.216<br>(0.015–0.389) | 18.1<br>(7.56–51.56)                                                                      | 0.0455<br>(0.0433–0.0584) |
| Mashonaland West    | $8.518 \cdot E - 5$<br>(0.30–43.5)·E–5   | 0.022<br>(0.014–0.036)                   | 0.32<br>(0.30–0.44)    | 9.87<br>(7.09–15.38)                                                                      | 0.061<br>(0.060–0.063)    |
| Mashonaland Central | $9.59 \cdot E - 3$<br>(8.5–12.4)·E–3     | $9.38 \cdot E - 5$<br>(7.86–12.0)·E–5    | 0.371<br>(0.333–0.467) | 7.02<br>(7.003–7.594)                                                                     | 0.0468<br>(0.0466–0.0486) |
| Mashonaland East    | $1.123 \cdot E - 2$<br>(0.789–1.154)·E–2 | $6.853 \cdot E - 5$<br>(0.008–7.67)·E–5  | 0.263<br>(0.176–0.61)  | 7.219<br>(7.001–7.228)                                                                    | 0.105<br>(0.104–0.109)    |
| Midlands            | $4.891 \cdot E - 3$<br>(4.575–5.633)·E–3 | $3.0 \cdot E - 5$<br>(2.57–4.04)·E–5     | 0.712<br>(0.578–0.815) | 7.035<br>(7.002–7.260)                                                                    | 0.0689<br>(0.0686–0.0703) |
| Manicaland          | $4.734 \cdot E - 5$<br>(0.128–17.73)·E–5 | $1.401 \cdot E - 2$<br>(0.69–1.511)·E–2  | 0.976<br>(0.852–0.999) | 8.881<br>(7.19–13.72)                                                                     | 0.0696<br>(0.0685–0.0708) |
| Masvingo            | $9.095 \cdot E - 3$<br>(7.265–9.140)·E–3 | $3.785 \cdot E - 6$<br>(0.078–8.585)·E–6 | 0.997<br>(0.979–0.998) | 7.024<br>(7.006–7.984)                                                                    | 0.102<br>(0.101–0.105)    |
| Matabeleland North  | $1.036 \cdot E - 5$<br>(0.361–52.0)·E–5  | $2.047 \cdot E - 3$<br>(0.70–2.15)·E–3   | 0.78<br>(0.092–0.90)   | 7.75<br>(7.07–13.62)                                                                      | 0.082<br>(0.081–0.101)    |
| Matabeleland South  | $2.652 \cdot E - 3$<br>(2.642–4.257)·E–3 | $2.162 \cdot E - 2$<br>(2.0–3.2)·E–2     | 0.9797<br>(0.87–0.998) | 7.3<br>(7.018–8.998)                                                                      | 0.0414<br>(0.0387–0.043)  |
