# Supplementary material for: An Optimal Cost Effectiveness Study on Zimbabwe Cholera Seasonal Data from 2008–2011
Source: PubMed Central journal article supplement (PMC3849194; doi:10.1371/journal.pone.0081231), 2013-12-03
Supplement: pone.0081231.s006.pdf [file pone.0081231.s006.pdf]

| Zimbabwe province   | $S(0)(person)$               | $I(0)(person)$   | $R(0)(person)$  | $B_H(0) \left( \frac{cells}{mL} \right)$ | $B_L(0) \left( \frac{cells}{mL} \right)$ | $C(0)(person)$      | $D(0)(person)$ |
|---------------------|------------------------------|------------------|-----------------|------------------------------------------|------------------------------------------|---------------------|----------------|
| Harare              | 934947<br>(809355–1354411)   | 122<br>(4–192)   | 129<br>(7–147)  | 59000<br>(42184–79999)                   | 2955<br>(54–8699)                        | 106<br>(1–119)      | 7<br>(0–24)    |
| Bulawayo            | 324497<br>(303446–674715)    | 8<br>(0–9)       | 3<br>(3–6)      | 417273<br>(38725–422806)                 | 7945<br>(206–21243)                      | 1<br>(0–9)          | 3<br>(0–3)     |
| Mashonaland West    | 978852<br>(762909–1273118)   | 20<br>(1–39)     | 4<br>(0–15)     | 48641<br>(24945–90623)                   | 13671<br>(171–25332)                     | 26<br>(1–38)        | 0<br>(0–5)     |
| Mashonaland Central | 791525<br>(606360–846991)    | 4<br>(0–8)       | 5<br>(1–21)     | 2<br>(0–17)                              | 20680383<br>(15675590–31190398)          | 1<br>(1–30)         | 1<br>(0–4)     |
| Mashonaland East    | 712785<br>(706089–958344)    | 119<br>(115–125) | 30<br>(2–78)    | 18<br>(17–77)                            | 7147787<br>(1177–7755845)                | 60<br>(0–116)       | 11<br>(8–12)   |
| Midlands            | 1397804<br>(1221465–1461080) | 4<br>(0–7)       | 17<br>(3–19)    | 1<br>(0–11)                              | 2726527<br>(2027236–2875339)             | 0<br>(0–32)         | 0<br>(0–3)     |
| Manicaland          | 1070249<br>(1014932–1645816) | 4<br>(0–5)       | 2<br>(0–3)      | 53965<br>(41117–82823)                   | 1100<br>(89–12375)                       | 1<br>(0–5)          | 1<br>(0–1)     |
| Masvingo            | 710368<br>(708835–857436)    | 33<br>(30–39)    | 5<br>(0–20)     | 487<br>(478–658)                         | 555732<br>(780–1016045)                  | 10<br>(1–38)        | 1<br>(0–3)     |
| Matabeleland North  | 512234<br>(301820–502397)    | 2<br>(0–2)       | 1<br>(0–2)      | 199051<br>(54911–318912)                 | 803<br>(614–668969)                      | 1<br>(0–2)          | 0<br>(0–1)     |
| Matabeleland South  | 328003<br>(241114–328550)    | 370<br>(337–703) | 444<br>(40–781) | 5715<br>(3717–27562)                     | 28187<br>(755–28641)                     | 1252<br>(1157–1299) | 50<br>(42–50)  |
